## 1 Gain of gene regulatory network interconnectivity at the origin of vertebrates

2  
3 Alejandro Gil-Gálvez<sup>1\*</sup>, Sandra Jiménez-Gancedo<sup>1\*</sup>, Rafael D. Acemel<sup>1</sup>, Stephanie  
4 Bertrand<sup>2</sup>, Michael Schubert<sup>3</sup>, Héctor Escrivá<sup>2</sup>, Juan J. Tena<sup>1#</sup>, José Luis Gómez-  
5 Skarmeta<sup>1#</sup>

6  
7 <sup>1</sup>Centro Andaluz de Biología del Desarrollo (CABD), Consejo Superior de  
8 Investigaciones Científicas-Universidad Pablo de Olavide-Junta de Andalucía, Seville,  
9 Spain

10 <sup>2</sup>Sorbonne Université, CNRS, Biologie Intégrative des Organismes Marins, BIOM,  
11 Observatoire Océanologique, F-66650, Banyuls/Mer, France

12 <sup>3</sup>Sorbonne Université, CNRS, Laboratoire de Biologie du Développement de  
13 Villefranche-sur-Mer, Institut de la Mer de Villefranche, Villefranche-sur-Mer, France

14  
15 \*These authors contributed equally

16 #Corresponding authors: [jjtenagu@upo.es](mailto:jjtenagu@upo.es); [jlgomaska@upo.es](mailto:jlgomaska@upo.es)

### 17 Abstract

18 **Signaling pathways control a large number of gene regulatory networks (GRNs)**  
19 **during animal development, acting as major tools for body plan formation<sup>1</sup>.**  
20 **Remarkably, in contrast to the large number of transcription factors present in**  
21 **animal genomes, only a few of these pathways operate during development<sup>2</sup>.**  
22 **Moreover, most of them are largely conserved along metazoan evolution<sup>3</sup>. How**  
23 **evolution has generated a vast diversity of animal morphologies with such a**  
24 **limited number of tools is still largely unknown. Here we show that gain of**  
25 **interconnectivity between signaling pathways, and the GRNs they control, may**  
26 **have played a critical contribution to the origin of vertebrates. We perturbed the**  
27 **retinoic acid, Wnt, FGF and Nodal signaling pathways during gastrulation in**  
28 **amphioxus and zebrafish and comparatively examined its effects in gene**  
29 **expression and cis-regulatory elements (CREs). We found that multiple**  
30 **developmental genes gain response to these pathways through novel CREs in the**  
31 **vertebrate lineage. Moreover, in contrast to amphioxus, many of these CREs are**  
32 **highly interconnected and respond to multiple pathways in zebrafish.**  
33 **Furthermore, we found that vertebrate-specific cell types are more enriched in**  
34 **highly interconnected genes than those tissues with more ancestral origin. Thus,**  
35 **the increase of CREs in vertebrates integrating inputs from different signaling**  
36 **pathways probably contributed to gene expression complexity and the formation**  
37 **of new cell types and morphological novelties in this lineage.**

38  
39  
40 During embryonic development, thousands of genes are expressed in a coordinated and  
41 tightly regulated manner. This coordination is facilitated by complex hierarchical  
42 relationships between different genes<sup>4,5</sup>, where the expression of a determined gene  
43 triggers the transcription of many others, in a multi-level cascade that can involve  
44 hundreds of different genes<sup>6</sup>. Signaling pathways control most of these genetic  
45 cascades, interconnecting many genes and playing pivotal roles in more complex gene  
46 regulatory networks (GRNs). As a consequence, they are key substrates for the  
47 generation of morphological diversity during evolution<sup>1</sup>.

48 It has been already demonstrated that, after the vertebrate-specific whole genome  
49 duplications, many duplicated developmental genes were maintained in this group<sup>7</sup>.  
50 Furthermore, is also known that regulatory landscapes in general, and especially those

51 of developmental genes, have been expanded in vertebrate lineage<sup>8</sup>. However, it still  
52 remains unclear how these features interplay to generate organisms with higher  
53 complexity such as vertebrates. It is well known that the complexity of networks is not  
54 only dictated by the number of nodes but also by the number and patterns of interactions  
55 among those elements. In this context, effectors of signaling pathways constitute hubs  
56 in Gene regulatory networks (GRNs).

57 Here we investigate the contribution of key signaling pathways in the transition from  
58 invertebrates to vertebrates. To study this question, we compare the effect of interfering  
59 with the retinoic acid (RA), Wnt, FGF and Nodal pathways during gastrulation in both  
60 amphioxus (cephalochordate) and zebrafish embryos. To do so, we used compounds  
61 known to act either as agonists of the RA and Wnt or antagonists of the FGF and Nodal  
62 pathways<sup>9</sup>. We then examined the impact of these treatments on global gene expression  
63 by RNA-seq in both species (Fig. 1a, Extended Data Fig. 1). Additionally, we  
64 performed ATAC-seq to identify open chromatin regions<sup>10</sup>, including enhancers and  
65 promoters, affected by these manipulations (Fig. 1a, Extended Data Fig. 1).

66 The whole genome duplications (WGDs) at the base of the vertebrate lineage<sup>7,11</sup> and the  
67 additional WGD in the teleost lineage<sup>12</sup> result in gene number imbalance between  
68 amphioxus and zebrafish. To overcome this limitation in our analysis, we used  
69 previously published data<sup>8</sup> to retrieve all the vertebrate gene family members  
70 corresponding to each amphioxus gene affected by the treatments. For zebrafish, we  
71 only used the affected gene.

72 RNA-seq analysis revealed hundreds of differentially expressed genes following the  
73 different treatments in both amphioxus and zebrafish (Extended Data Fig. 1).  
74 Interestingly, we found transcripts similarly altered in both species upon the same  
75 treatment (Fig. 1b). Gene Ontology (GO) analysis for these common transcripts  
76 confirmed that they are highly associated with developmental processes, e.g. mesoderm,  
77 endoderm and hindbrain development, known to be regulated by the examined signaling  
78 pathways<sup>9,13,14</sup> (Fig. 1b, Extended Data Table 1). Surprisingly, only few genes were  
79 similarly affected upon Wnt activation in both species (Fig. 1b, Extended Data Table 1).  
80 We then examined all the genes affected by each of these treatments, and we observed  
81 that the number of genes perturbed in zebrafish are higher than in amphioxus, and,  
82 proportionally, more strongly associated with development and signaling terms.  
83 Moreover, confirming our experimental approach, the genes altered by these treatments,  
84 and their corresponding GOs, clearly associate with developmental processes known to  
85 be regulated by these pathways<sup>9,13,14</sup> (Extended Data Fig. 2, Extended Data Table 2).

86 We next analyzed our ATAC-seq data by searching for motifs enriched in peaks either  
87 more accessible after the treatment with RA or Wnt agonists, or less accessible upon the  
88 treatment with Nodal or FGF inhibitors. The binding sites for transcription factors (TFs)  
89 that mediate signaling by these pathways and/or well-known downstream TFs of these  
90 pathways were found for all treatments in both species<sup>15-29</sup> (Extended Data Fig. 3,  
91 Extended Data Table 3). Overall, these results confirm that the pharmacological  
92 treatments of amphioxus and zebrafish embryos indeed perturbed the targeted pathways  
93 *in vivo*.

94 To better classify the genes that respond to interference of the different signaling  
95 pathways, we performed a clustering analysis of gene expression, which resulted in  
96 groups of genes with similar transcriptional behavior (Fig. 2a). We then carried out GO  
97 enrichment analyses of these groups. The RNA-seq-derived clusters in zebrafish were  
98 mostly associated with GO terms related to embryonic development, while in  
99 amphioxus we also detected many terms related to metabolism and cell homeostasis  
100 (Fig. 2a, Extended Data Table 4). In some cases, the GO terms were specifically

101 associated with a single pathway. In amphioxus, this was for example the case for  
102 retinol metabolism in genes upregulated by RA treatment (dark blue cluster) and for  
103 muscle cell differentiation in genes downregulated by Nodal inhibition (orange cluster).  
104 In zebrafish, heart formation and somitogenesis were associated with, respectively,  
105 Nodal and FGF inhibition (orange and light blue clusters), while brain development was  
106 associated with Wnt pathway activation (light green cluster) (Fig. 2a). This cluster  
107 analysis also revealed that, in both amphioxus and zebrafish, the majority of  
108 developmental processes are influenced by several of the studied signaling pathways.  
109 In the case of ATAC-seq peaks clustering, we assigned peaks to their putative target  
110 genes using the GREAT algorithm<sup>30</sup>, in order to derive GO terms. In general, we  
111 observed a good correlation between the average ATAC-seq signal around the peaks in  
112 the different clusters, the GO terms of their putative target genes and the TF binding  
113 motifs identified within these peaks (Fig. 2b). Furthermore, open chromatin regions  
114 altered upon treatments were mainly associated with development, especially in  
115 zebrafish (Fig. 2b), which is consistent with our RNA-seq analysis. For example, the  
116 zebrafish cluster of ATAC-seq peaks that was, in average, more accessible upon Wnt  
117 stimulation (blue cluster), was associated with brain development (Fig. 2b). In addition,  
118 TCF3 motifs were found within these peaks (Fig. 2b). Similarly, in both species, the  
119 clusters enriched following RA treatment (dark purple cluster in amphioxus, dark green  
120 cluster in zebrafish) were associated with response to RA and hindbrain development  
121 (Fig. 2b). The clusters in both species further contain RAR:RXR motifs (Fig. 2b).  
122 The majority of ATAC-seq peaks clusters are characterized by changes in more than  
123 one signaling pathway, which is similar to what we observed for the RNA-seq  
124 clustering. Several signaling pathways thus seem to act on the same ATAC-seq peaks,  
125 suggesting a certain level of interconnection between the different pathways.  
126 In order to directly compare the integrated effect of the treatments at the transcriptomic  
127 and regulatory levels in both species, we intersected the differentially regulated genes at  
128 the transcriptomic level with the genes associated with differential ATAC-seq peaks for  
129 each treatment and species. In this analysis, we included both positively and negatively  
130 affected genes/regulatory elements. The intersection resulted in a total of 2098 genes  
131 and 4609 ATAC-seq peaks in zebrafish and 481 genes and 853 ATAC-seq peaks in  
132 amphioxus (Extended Data Table 5). Although the lower numbers of treatment-affected  
133 genes and ATAC-seq peaks in amphioxus could correspond to a loss of regulatory  
134 information in this species, it is known that there was a general gain of regulatory input  
135 in vertebrates<sup>8</sup>. Thus, it is very likely that this rather indicates a gain of response to  
136 these signaling pathways in vertebrates, through the incorporation of novel cis-  
137 regulatory elements (CREs).  
138 We then clustered the results of GO enrichment analyses associated with these genes in  
139 amphioxus and zebrafish (Fig. 3, Extended Data Fig. 4). We found that the p-values  
140 associated to the enriched GO terms were, in general, much lower in zebrafish than in  
141 amphioxus, and the number of GO terms significantly affected by the different  
142 treatments were much higher (Fig. 3). This suggests that, in the vertebrate, the  
143 regulatory networks involved in developmental processes are more complex. The same  
144 effect was observed using the number of gene families (which are not affected by the  
145 overestimation of the number of genes in amphioxus due to the inclusion of whole  
146 families of orthologous genes in our lists) instead of p-values (Extended Data Fig. 4).  
147 These results further support that there are more genes controlled by these signaling  
148 pathways in vertebrates. Among the genes we identified in zebrafish were a large  
149 number of TFs and regulators of different signaling pathways (Extended Data Table 6).  
150 We also found that some GO terms in zebrafish were significantly enriched for

151 signaling pathways (for example, FGF and Nodal pathways share many development-  
152 related terms, Fig. 3). These two facts indicate that, in agreement with the results of our  
153 previous clustering analysis, different signaling pathways are interconnected and that  
154 the degree of connectivity is higher in vertebrates compared to invertebrates. To directly  
155 test this, we counted the number of genes that were affected by manipulating one, two,  
156 three or four different signaling pathways in zebrafish and amphioxus. Interestingly,  
157 independently of considering only RNA-seq data or combining RNA-seq and ATAC-  
158 seq information, we found that the interconnection between pathways was higher in  
159 zebrafish than in amphioxus, with a higher proportion of genes responding to two, three  
160 or four perturbations in zebrafish (Fig. 4a, Extended Data Fig. 5a). Moreover, we  
161 observed an increase of connectivity in vertebrates independent of the number of genes  
162 retained after the WGD events (Extended Data Fig. 5b). Nevertheless, the more copies  
163 retained, the higher the gain of connectivity (Extended Data Fig. 5c). Using already  
164 available single cell RNA-seq data<sup>31</sup> we observed that, interestingly, tissues that  
165 appeared as novelties during the invertebrate to vertebrate transition, such as the neural  
166 crest cells or the sensory placodes, showed an enrichment in the expression of highly  
167 connected genes, while in more evolutionary ancient tissues, like the muscles or the  
168 intestine, the expression of highly and lowly connected genes was very similar (Fig. 4b,  
169 Extended Data Fig. 6). Finally, we used the Cytoscape tool<sup>32</sup> to visualize all connections  
170 between genes and the different signaling pathways in amphioxus and zebrafish (Fig.  
171 4c). This plot clearly shows that developmental GRNs associated with these four  
172 signaling pathways are more interconnected in vertebrates.

173 By comparing epigenomic and transcriptomic data in amphioxus, zebrafish and other  
174 vertebrates, we recently showed that the invertebrate to vertebrate transition is  
175 associated with an increase of regulatory information in the latter lineage and that this  
176 increase likely contributed to the spatial and functional specialization of some  
177 duplicated genes<sup>8</sup>. Here, we demonstrate that some of the novel vertebrate CREs  
178 contribute to a more complex interconnection between the RA, Wnt, FGF and Nodal  
179 signaling pathways. An increased interconnection between these four key  
180 developmental signaling pathways likely facilitated the restriction of the expression  
181 domains of some duplicated developmental genes, which, in turn, contributed to the  
182 increment of tissue complexity required to generate morphological novelties in  
183 vertebrates.

184

185

## 186 References

- 187 1. Pires-daSilva, A. & Sommer, R. J. The evolution of signalling pathways in  
188 animal development. *Nature Reviews Genetics* **4**, 39–49 (2003).
- 189 2. Sanz-Ezquerro, J. J., Münsterberg, A. E. & Stricker, S. Editorial: Signaling  
190 pathways in embryonic development. *Frontiers in Cell and Developmental*  
191 *Biology* **5**, 76 (2017).
- 192 3. Babonis, L. S. & Martindale, M. Q. Phylogenetic evidence for the modular  
193 evolution of metazoan signalling pathways. *Philosophical Transactions of the*  
194 *Royal Society B: Biological Sciences* **372**, (2017).
- 195 4. Ravasz, E., Somera, A. L., Mongru, D. A., Oltvai, Z. N. & Barabási, A. L.  
196 Hierarchical organization of modularity in metabolic networks. *Science (80-. )*.  
197 **297**, 1551–1555 (2002).
- 198 5. Barabási, A. L. & Oltvai, Z. N. Network biology: Understanding the cell's  
199 functional organization. *Nature Reviews Genetics* **5**, 101–113 (2004).
- 200 6. Azpeitia, E. *et al.* The combination of the functionalities of feedback circuits is

- 201 determinant for the attractors' number and size in pathway-like Boolean  
202 networks. *Sci. Rep.* **7**, 42023 (2017).
- 203 7. Putnam, N. H. *et al.* The amphioxus genome and the evolution of the chordate  
204 karyotype. *Nature* **453**, 1064–1071 (2008).
- 205 8. Marlétaz, F. *et al.* Amphioxus functional genomics and the origins of vertebrate  
206 gene regulation. *Nature* **564**, 64–70 (2018).
- 207 9. Bertrand, S., Petillon, Y. Le, Somorjai, I. M. L. & Escriva, H. Developmental  
208 cell-cell communication pathways in the cephalochordate amphioxus: Actors and  
209 functions. *Int. J. Dev. Biol.* **61**, 697–722 (2017).
- 210 10. Buenrostro, J. D., Giresi, P. G., Zaba, L. C., Chang, H. Y. & Greenleaf, W. J.  
211 Transposition of native chromatin for fast and sensitive epigenomic profiling of  
212 open chromatin, DNA-binding proteins and nucleosome position. *Nat. Methods*  
213 **10**, 1213–1218 (2013).
- 214 11. Dehal, P. & Boore, J. L. Two rounds of whole genome duplication in the  
215 ancestral vertebrate. *PLoS Biol.* **3**, e314 (2005).
- 216 12. Christoffels, A. *et al.* Fugu genome analysis provides evidence for a whole-  
217 genome duplication early during the evolution of ray-finned fishes. *Mol. Biol.*  
218 *Evol.* **21**, 1146–1151 (2004).
- 219 13. Kiecker, C., Bates, T. & Bell, E. Molecular specification of germ layers in  
220 vertebrate embryos. *Cellular and Molecular Life Sciences* **73**, 923–947 (2016).
- 221 14. Tuazon, F. B. & Mullins, M. C. Temporally coordinated signals progressively  
222 pattern the anteroposterior and dorsoventral body axes. *Semin. Cell Dev. Biol.* **42**,  
223 118–133 (2015).
- 224 15. Böttcher, R. T. & Niehrs, C. Fibroblast growth factor signaling during early  
225 vertebrate development. *Endocr. Rev.* **26**, 63–77 (2005).
- 226 16. Cadigan, K. M. & Waterman, M. L. TCF/LEFs and Wnt signaling in the nucleus.  
227 *Cold Spring Harb. Perspect. Biol.* **4**, (2012).
- 228 17. Charney, R. M., Paraiso, K. D., Blitz, I. L. & Cho, K. W. Y. A gene regulatory  
229 program controlling early *Xenopus* mesendoderm formation: Network  
230 conservation and motifs. *Seminars in Cell and Developmental Biology* **66**, 12–24  
231 (2017).
- 232 18. Bian, S. S. *et al.* Clock1a affects mesoderm development and primitive  
233 hematopoiesis by regulating Nodal-Smad3 signaling in the zebrafish embryo. *J.*  
234 *Biol. Chem.* **292**, 14165–14175 (2017).
- 235 19. Jia, S., Ren, Z., Li, X., Zheng, Y. & Meng, A. smad2 and smad3 are required for  
236 mesendoderm induction by transforming growth factor- $\beta$ /nodal signals in  
237 zebrafish. *J. Biol. Chem.* **283**, 2418–2426 (2008).
- 238 20. Kjolby, R. A. S., Truchado-Garcia, M., Iruvanti, S. & Harland, R. M. Integration  
239 of Wnt and FGF signaling in the *xenopus* gastrula at TCF and Ets binding sites  
240 shows the importance of short-range repression by TCF in patterning the  
241 marginal zone. *Dev.* **146**, (2019).
- 242 21. Tian, T. & Meng, A. M. Nodal signals pattern vertebrate embryos. *Cell. Mol. Life*  
243 *Sci.* **63**, 672–685 (2006).
- 244 22. Friedman, J. R. & Kaestner, K. H. The Foxa family of transcription factors in  
245 development and metabolism. *Cell. Mol. Life Sci.* **63**, 2317–2328 (2006).
- 246 23. Ghyselinck, N. B. & Duester, G. Retinoic acid signaling pathways. *Dev.* **146**,  
247 (2019).
- 248 24. Hoodless, P. A. *et al.* FoxH1 (Fast) functions to specify the anterior primitive  
249 streak in the mouse. *Genes Dev.* **15**, 1257–1271 (2001).
- 250 25. Joshi, P., Darr, A. J. & Skromne, I. CDX4 regulates the progression of neural

- 251 maturation in the spinal cord. *Dev. Biol.* **449**, 132–142 (2019).  
252 26. Kjolby, R. A. S. & Harland, R. M. Genome-wide identification of Wnt/ $\beta$ -catenin  
253 transcriptional targets during *Xenopus* gastrulation. *Dev. Biol.* **426**, 165–175  
254 (2017).  
255 27. Aldea, D. *et al.* Genetic regulation of amphioxus somitogenesis informs the  
256 evolution of the vertebrate head mesoderm. *Nat. Ecol. Evol.* **3**, 1233–1240  
257 (2019).  
258 28. Onai, T. Canonical Wnt/ $\beta$ -catenin and Notch signaling regulate animal/vegetal  
259 axial patterning in the cephalochordate amphioxus. *Evol. Dev.* **21**, 31–43 (2019).  
260 29. Yasuoka, Y., Tando, Y., Kubokawa, K. & Taira, M. Evolution of cis-regulatory  
261 modules for the head organizer gene gooseoid in chordates: Comparisons  
262 between *Branchiostoma* and *Xenopus*. *Zool. Lett.* **5**, 27 (2019).  
263 30. McLean, C. Y. *et al.* GREAT improves functional interpretation of cis-regulatory  
264 regions. *Nat. Biotechnol.* **28**, 495–501 (2010).  
265 31. Farnsworth, D. R., Saunders, L. M. & Miller, A. C. A single-cell transcriptome  
266 atlas for zebrafish development. *Dev. Biol.* **459**, 100–108 (2020).  
267 32. Shannon, P. *et al.* Cytoscape: A software Environment for integrated models of  
268 biomolecular interaction networks. *Genome Res.* **13**, 2498–2504 (2003).  
269  
270

## 271 **Acknowledgements**

272 We thank all members of JLGS laboratory for fruitful discussions, and C3UPO for HPC  
273 support. We especially thank José María Santos-Pereira, Martin Franke, Christina  
274 Paliou Ignacio Maeso and Manuel Irimia for helpful comments on the manuscript. This  
275 project has received funding from the European Research Council (ERC) under the  
276 European Union’s Horizon 2020 research and innovation programme (grant agreement  
277 No 740041), the Spanish Ministerio de Economía y Competitividad (grants BFU2016-  
278 74961-P to JLGS and BFU2014-58449-JIN to JJT). This work was also supported by  
279 the institutional grant Unidad de Excelencia María de Maeztu (MDM-2016-0687 to the  
280 Department of Gene regulation and morphogenesis of Centro Andaluz de Biología del  
281 Desarrollo). HE and SB were supported by the CNRS and the ANR CHORELAND,  
282 ANR-16-CE12-0008-01.  
283

## 284 **Author contributions**

285 A.G.-G., S.J.-G., J.J.T. and R.D.A. performed experiments and computation analyses.  
286 S.B. and H.E. obtained biological material and performed experiments. M.S. provided  
287 reagents. J.J.T. and J.L.G.-S. coordinated the project, contributed to the study design  
288 and wrote the main text with input from all authors.

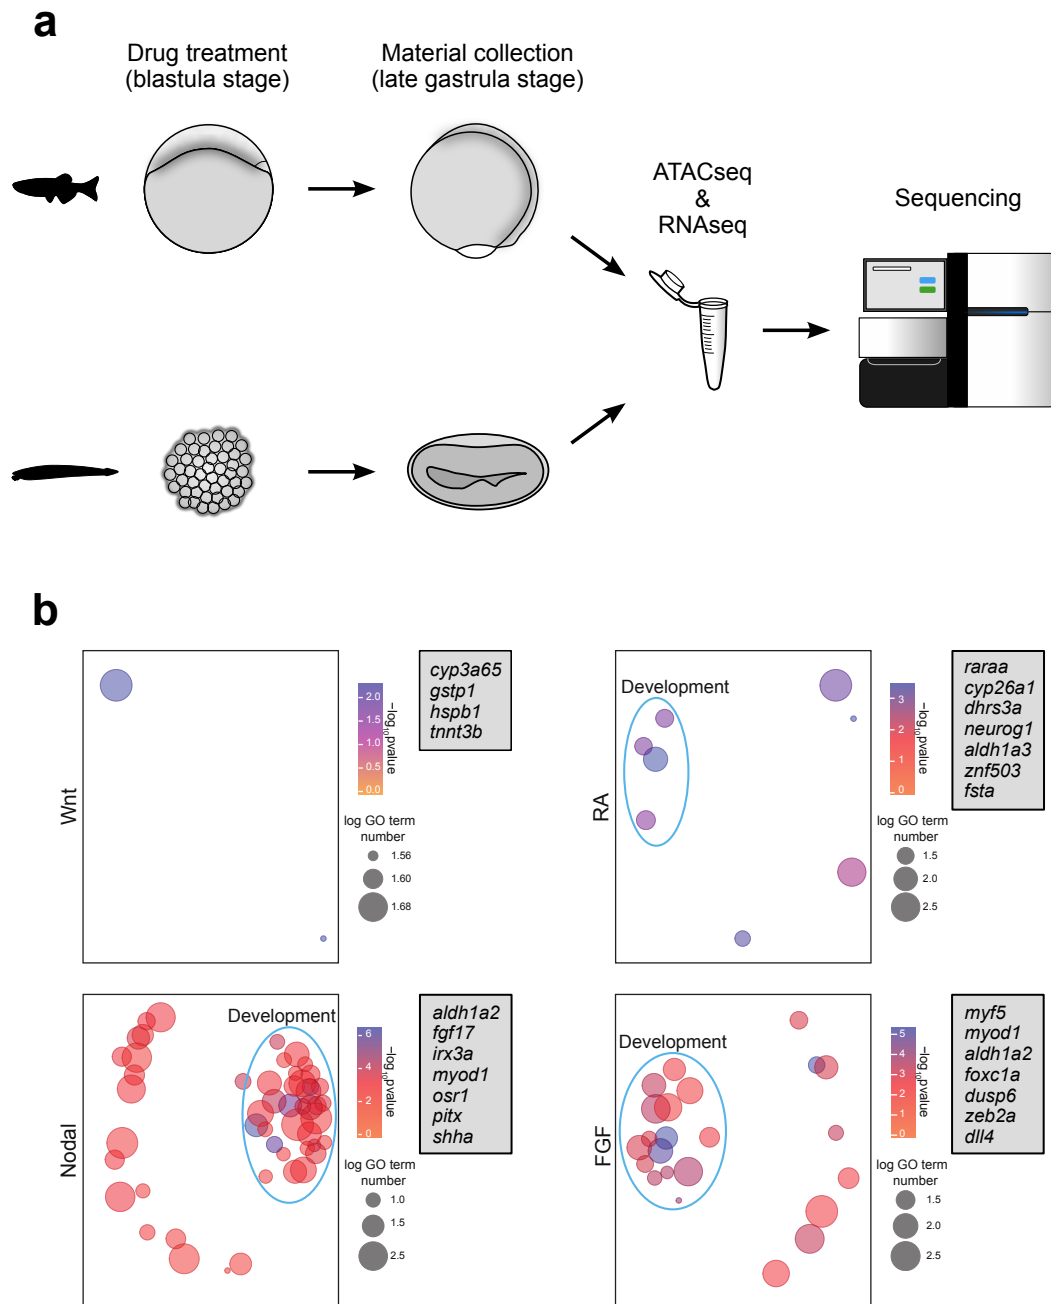

289  
290

291 **Figure 1. Experimental design and differential analyses.** **a.** Overall design of the  
292 experiment: zebrafish and amphioxus embryos were treated with four different  
293 compounds at the blastula stage and dissociated at the late gastrula stage for RNA-seq  
294 and ATAC-seq library preparations. **b.** Gene ontology (GO) term enrichment analysis  
295 for common genes differentially expressed in both amphioxus and zebrafish. Each panel  
296 shows GO enrichment visualization obtained with the REVIGO tool for one of the  
297 treatments, taking into account only genes significantly modified upon the indicated  
298 treatment. Circles represent GO terms, and the X and Y axes map the semantic space:  
299 the closer the terms appear in the plot, the more related they are. In order to facilitate  
300 direct comparisons, a blue line surrounds GO terms associated with developmental

301 processes. Gray boxes at the right of each panel show some of the developmental genes  
302 represented in the plot.  
303



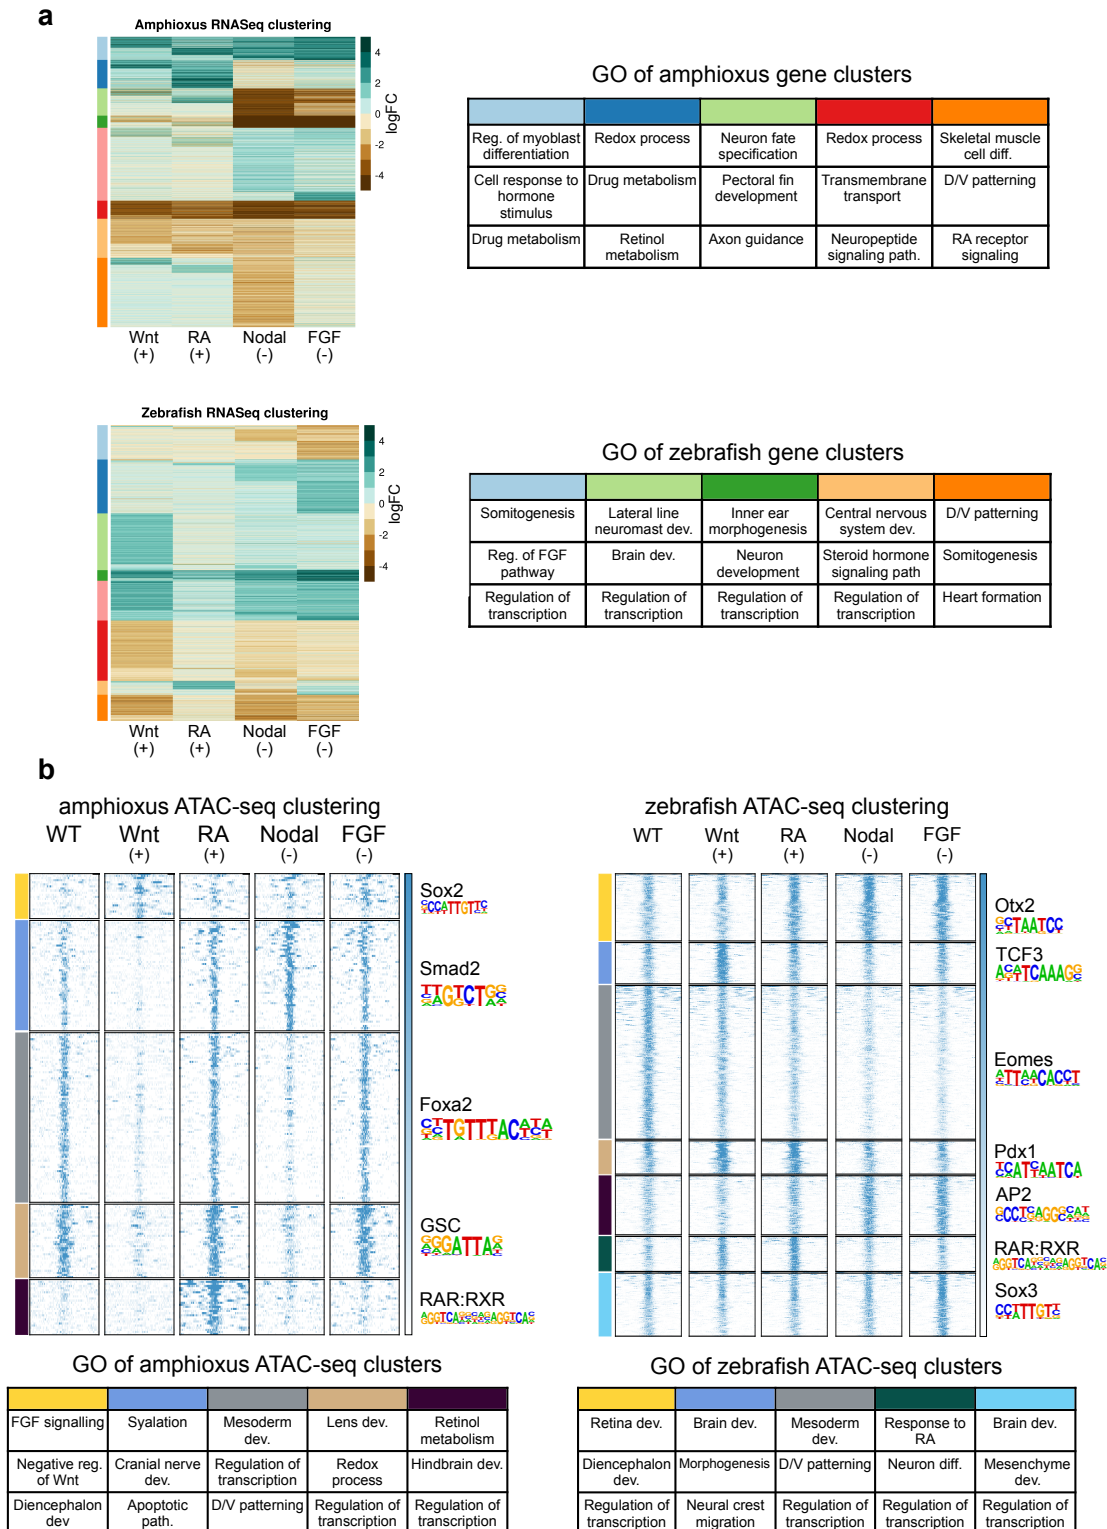

304  
305  
306  
307  
308  
309  
310

**Figure 2. Clustering of RNA-seq and ATAC-seq data. a.** RNA-seq-derived gene expression fold change (FC) in amphioxus (upper panel) and zebrafish (bottom panel). FC values are calculated for each condition versus control samples by means of DGE analyses. Tables on the right show three representative gene ontology (GO) terms enriched in the cluster marked with the same color. **b.** Clustering of ATAC-seq data in amphioxus (left) and zebrafish (right). Top DNA binding motif found in each cluster is

311 represented on the right, and three representative GO terms enriched in the clusters are  
312 shown in the tables below.  
313

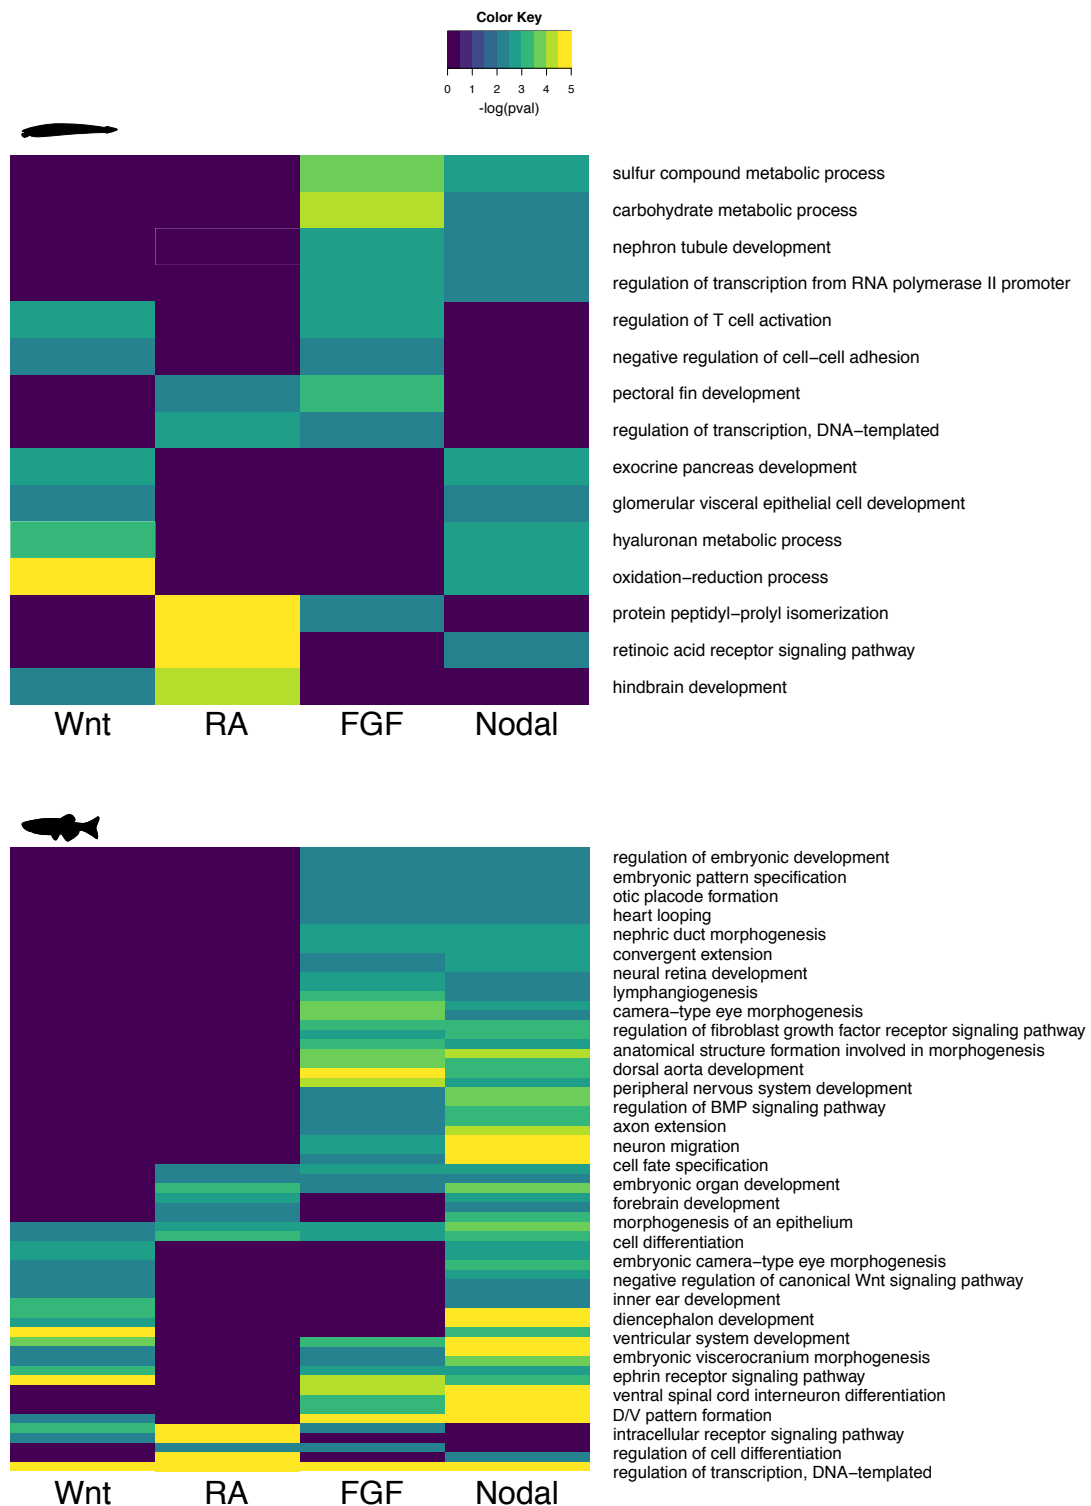

314  
315  
316  
317  
318  
319  
320  
321

**Figure 3. Clustering of GO terms.** Gene ontology (GO) terms enriched in differentially regulated genes at the transcriptomic level (based on RNA-seq analysis) that are also associated to differential ATAC-seq peaks, clustered by associated p-values (pval) in amphioxus (upper panel) and zebrafish (bottom panel).

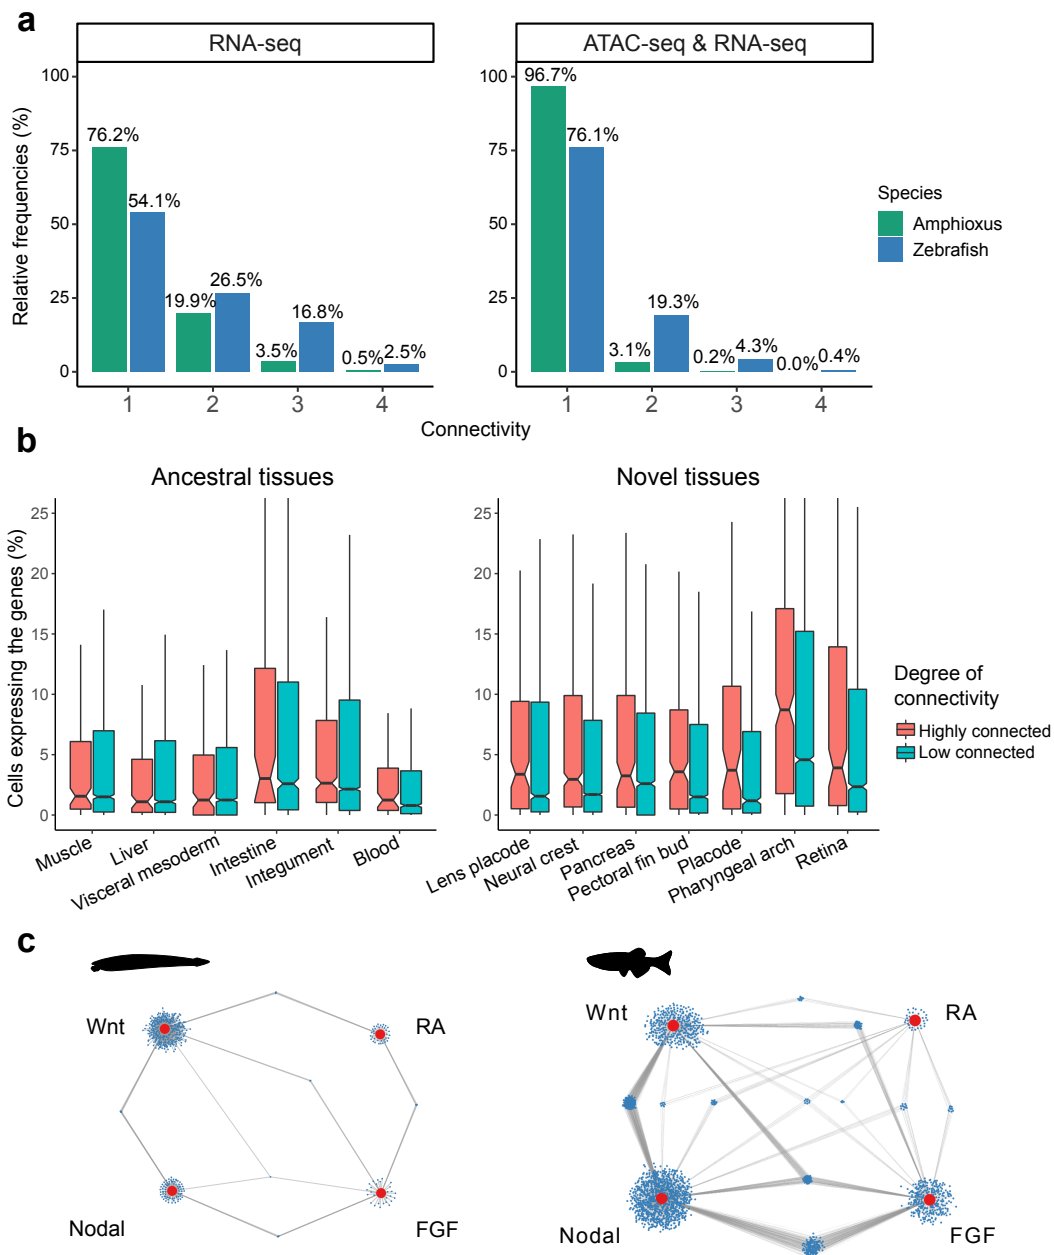

322  
 323 **Figure 4. Gene connectivity to different signaling pathways.** **a.** Percentage of genes  
 324 that respond to one, two, three or four different pathways in amphioxus (green bars) and  
 325 zebrafish (blue bars), only at the RNA-seq level (left panel) or at both the RNA-seq and  
 326 ATAC-seq level (right panel). **b.** Number of cells expressing highly connected genes  
 327 (connectivity  $\geq 3$ , pink bars) and lowly connected genes (connectivity = 1, light blue  
 328 bars) according to single cell RNA-seq experiments carried out in zebrafish<sup>31</sup> in  
 329 ancestral tissues (and thus also present in amphioxus) (left panel) and in vertebrate  
 330 specific tissues (right panel). **c.** Cytoscape plot showing connectivity networks in  
 331 amphioxus (left panel) and zebrafish (right panel). Small blue dots represent genes and  
 332 big red dots represent signaling pathways. Gray lines mark the responsiveness of each  
 333 gene to the connected signaling pathway.

334  
 335

## 336 **Methods**

337

### 338 Animal husbandry and treatment of embryos

339 *Danio rerio* embryos were manipulated following the protocols that have been approved  
340 by the Ethics Committee of the Andalusia Government (license number 182-41106) and  
341 the national and European regulation established. All experiments with zebrafish were  
342 carried out in accordance with the principles of 3Rs (replacement, reduction and  
343 refinement). Zebrafish embryos at 30% epiboly were treated by adding the different  
344 drugs to the medium. In the case of SB505124, embryos were treated at 256 cells stage.  
345 The final concentrations of drugs were: ATRA 0.1 $\mu$ M (cat n° R2625, Sigma-Aldrich  
346 Merck), SU5402 20 $\mu$ M (cat n° SML0444, Sigma-Aldrich Merck), BIO 14 $\mu$ M (cat n°  
347 B1686, Sigma-Aldrich Merck) and SB505124 30 $\mu$ M (cat n° S4696, Sigma-Aldrich  
348 Merck). These molecules were dissolved in DMSO (cat n° D2438, Sigma-Aldrich  
349 Merck). As a control experiment, the same volume of DMSO was added to the medium.  
350 Drugs were removed by changing the medium several times when embryos were at 80%  
351 epiboly stage. After that, embryos were carefully transferred to a glass Petri dish and  
352 chorion was removed using pronase.

353 *Branchiostoma lanceolatum* adults were collected at the Racou beach in Argelès-sur-  
354 Mer (France). Spawning was induced as previously described<sup>33,34</sup> and the fertilization of  
355 eggs was done in vitro. Amphioxus embryos were manipulated in filtered seawater  
356 unless otherwise specified. After fertilization, embryos were dechorionated in a Petri  
357 dish covered with agarose (0.8% agarose in filtered seawater) by pipetting them  
358 towards the border of the dish, and gently transferred to a small Petri dish. Drugs were  
359 dissolved in DMSO at the following final concentrations: ATRA 1 $\mu$ M (cat n° R2625,  
360 Sigma-Aldrich Merck), SU5402 25 $\mu$ M (cat n° 572630, Sigma-Aldrich Merck), BIO  
361 1 $\mu$ M (cat n° B1686, Sigma-Aldrich Merck) and SB505124 50 $\mu$ M (cat n° S4696, Sigma-  
362 Aldrich Merck). SB505124 drug was added to the filtered seawater at 3 hours post-  
363 fertilization stage, while the rest of the drugs were added at 5 hours post-fertilization  
364 stage. Control embryos were treated with 0.1% DMSO. Finally, at 15 hours post-  
365 fertilization, treated embryos were washed several times with filtered seawater in order  
366 to remove the drugs from the medium.

367

### 368 ATAC-seq

369 ATAC-seq assays were performed at least in two biological replicates. 45 Amphioxus  
370 embryos and 20 zebrafish embryos were dissociated in individual cells. After counting  
371 the number of cells, around 70000 cells were transferred to another tube to perform the  
372 experiment. ATAC-seq experiments were performed as previously described<sup>8,10</sup>.  
373 ATAC-seq data analyses were performed using standard pipelines<sup>8,10</sup>. Reads were  
374 aligned with Bowtie2 using GRCz10 (danRer10) and BI71<sup>8</sup> assemblies for zebrafish and  
375 amphioxus samples, respectively. Those reads that were separated by more than 2 Kb  
376 were filtered out of the analysis. The exact position of the Tn5 cutting site was  
377 determined as the position -4 (reverse strand) or +5 (forward strand) from the read start,  
378 and this position was extended 5 Kb in both directions. BED files were transformed into  
379 BigWig using the wigToBigWig UCSC tool. Reads were extended 100 bp in order to  
380 visualize the data in the UCSC Genome Browser<sup>35</sup>. Macs2<sup>36</sup> software was used in order  
381 to perform the peak calling in each sample, using the parameters --nomodel, --shift 45  
382 and --extsize 100. The different called peaks of each sample were merged into a unique  
383 set of peaks, taking into account replicates (two per sample). Then, using Bedtools<sup>37</sup>, we  
384 computed the number of reads per called peak and per sample in both treatment and  
385 control conditions, and a differential analysis was performed using DESeq2<sup>38</sup> v1.18.0 in

386 R 3.4.3. A corrected p value  $< 0.05$  was set as cutoff for statistical significance of the  
387 differential accessibility of the chromatin in ATAC-seq peaks. Motif enrichment was  
388 calculated using the program FindMotifsGenome.pl from Homer tool suite<sup>39</sup>.  
389 k-means clustering of ATAC-seq signal was performed using Deeptools 2.0<sup>40</sup> and  
390 seqMiner<sup>41</sup>.  
391 The assignment of ATAC-seq peaks to genes was done using the GREAT tool<sup>42</sup>, with  
392 default parameters for basal plus extension regions calculation. The Gene Ontology  
393 analysis was carried out using TopGO R package, using the *elim* test for taking the most  
394 specific GO enriched terms.

395

#### 396 RNA-seq

397 RNAseq experiments were performed in three biological replicates for each species.  
398 RNA samples were extracted from 15 zebrafish and 100 amphioxus embryos following  
399 already published protocols<sup>8</sup>.

400 For the data analysis, reads were aligned against GRCz10 (danRer10) and BI71  
401 assemblies using STAR<sup>43</sup> v2.5.3a and assigned to genes using the HTSeq toolkit<sup>44</sup>  
402 v0.11.2. Differential gene expression analyses were performed using DESeq2<sup>38</sup> v1.18.0.  
403 A corrected p value  $< 0.05$  and an absolute  $\log_2FC > 1$  were used as thresholds for  
404 calling differential genes. The enrichment of Biological process GO terms was  
405 calculated using the TopGO R package.

406 Gene clusterings were performed using Pheatmap 1.0.12 R package, using kmeans as  
407 clustering method.

408 The integration of differential ATAC-seq peaks and differential expressed genes was  
409 done at gene level in both species. The gene lists that resulted from both analyses for the  
410 same treatment were intersected in order to find genes that had a differential RNA-seq  
411 signal and also one or more associated differential ATAC-seq peaks.

412 Since there is no functional annotation of the amphioxus genes, the orthologous  
413 zebrafish genes were used for computing the GO term enrichment analysis. Amphioxus  
414 vs. zebrafish orthologous genes were already available from previous studies<sup>8</sup> (Extended  
415 Data Table 7).

416

#### 417 Connectivity analyses

418 In order to categorize genes that could be responding to more than one treatment, we  
419 computed a connectivity score. For this, we took into account only genes that responded  
420 at both ATAC-seq and RNA-seq levels. Each gene was assigned with a discrete score  
421 that ranges from 1 to 4, corresponding to the number of different treatments that they  
422 responded to. Cytoscape<sup>32</sup> networks were generated in order to better represent the  
423 connectivity of responsive genes. Connectivity tables are available in Extended Data  
424 Table 7.

425

#### 426 scRNA-seq analysis

427 We selected genes with high connectivity ( $\geq 3$ ) and low connectivity ( $=1$ ) from the  
428 previously published scRNA-seq zebrafish developmental atlas<sup>31</sup> and explore their  
429 expression levels in a set of ancient and vertebrate-specific novel tissues. A gene is  
430 defined as expressed in a cell if its normalized expression in that cell is greater than 0.  
431 For a certain tissue, we calculated the proportion of cells that expressed a certain gene,  
432 and aggregated these proportions for those genes that have high or low connectivity  
433 score in a boxplot. In order to determine which genes were expressed in each tissue, we  
434 set a threshold of a 5% of the cells of that specific tissue. Subsequently, for a direct

435 comparison between a set of ancestral tissues, present in both zebrafish and amphioxus,  
436 and another group of vertebrate-specific tissues, we computed and represented in  
437 barplots the ratio between genes with high connectivity score and those with low score  
438 expressed in each tissue.

439

440

#### 441 **References for Methods section**

442

- 443 33. Fuentes, M. *et al.* Preliminary observations on the spawning conditions of the  
444 European amphioxus (*Branchiostoma lanceolatum*) in captivity. *J. Exp. Zool.*  
445 *Part B Mol. Dev. Evol.* **302**, 384–391 (2004).
- 446 34. Fuentes, M. *et al.* Insights into spawning behavior and development of the  
447 European amphioxus (*Branchiostoma lanceolatum*). *J. Exp. Zool. Part B Mol.*  
448 *Dev. Evol.* **308**, 484–493 (2007).
- 449 35. Casper, J. *et al.* The UCSC Genome Browser database: 2018 update. *Nucleic*  
450 *Acids Res.* **46**, D762–D769 (2018).
- 451 36. Zhang, Y. *et al.* Model-based analysis of ChIP-Seq (MACS). *Genome Biol.* **9**,  
452 R137 (2008).
- 453 37. Quinlan, A. R. & Hall, I. M. BEDTools: A flexible suite of utilities for  
454 comparing genomic features. *Bioinformatics* **26**, 841–842 (2010).
- 455 38. Love, M. I., Huber, W. & Anders, S. Moderated estimation of fold change and  
456 dispersion for RNA-seq data with DESeq2. *Genome Biol.* **15**, (2014).
- 457 39. Heinz, S. *et al.* Simple Combinations of Lineage-Determining Transcription  
458 Factors Prime cis-Regulatory Elements Required for Macrophage and B Cell  
459 Identities. *Mol. Cell* **38**, 576–589 (2010).
- 460 40. Ramírez, F. *et al.* deepTools2: a next generation web server for deep-sequencing  
461 data analysis. *Nucleic Acids Res.* **44**, W160–W165 (2016).
- 462 41. Ye, T. *et al.* seqMINER: An integrated ChIP-seq data interpretation platform.  
463 *Nucleic Acids Res.* **39**, e35–e35 (2011).
- 464 42. Hiller, M. *et al.* Computational methods to detect conserved non-genic elements  
465 in phylogenetically isolated genomes: Application to zebrafish. *Nucleic Acids*  
466 *Res.* **41**, (2013).
- 467 43. Dobin, A. *et al.* STAR: Ultrafast universal RNA-seq aligner. *Bioinformatics* **29**,  
468 15–21 (2013).
- 469 44. Anders, S., Pyl, P. T. & Huber, W. HTSeq-A Python framework to work with  
470 high-throughput sequencing data. *Bioinformatics* **31**, 166–169 (2015).

471

472
